# Supplementary material
Source: publisher figshare collection journal article supplement (https://sage.figshare.com/ndownloader/files/17513273)

**Figure 1: Selection of analytic sample**

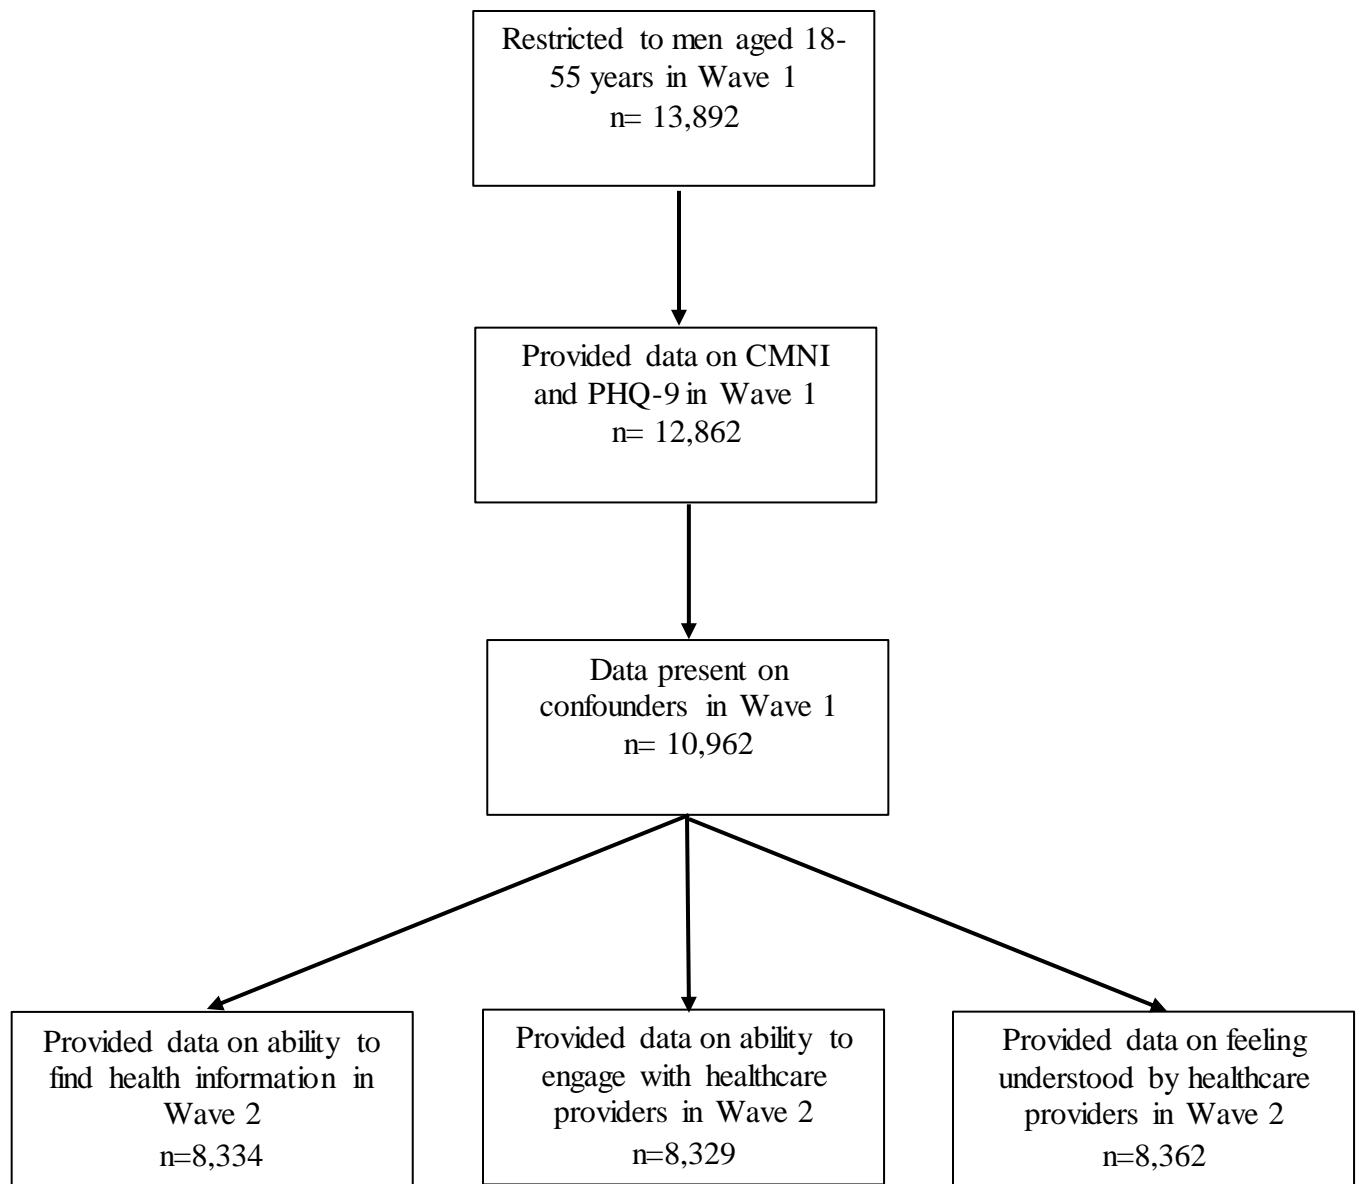

Supplement: Supplementary file 1 [file 17513273]
